# Supplementary material
Source: PubMed Central journal article supplement (PMC2581591)
Supplement: M804902200_1.pdf [file M804902200_1.pdf]

**Online Supplemental data for Song et al., “Differential Integration of Ca-Calmodulin Signal in Intact Ventricular Myocytes at Low and High Affinity Ca-Calmodulin Targets”.**

Each of the below reactions were included in both dyadic cleft and cytosolic compartments, with compartment-specific total concentrations as specified in Table 3.

***Ca binding to CaM and CaM buffering***

The models of CaM and CaM buffering used here, which are integrated into the dyadic cleft and cytosolic compartments of the Shannon-Bers EC coupling model Ref (1), were developed and validated in Ref (2).

Reaction fluxes were in units of [ $\mu\text{M sec}^{-1}$ ], for reactions of Ca binding to CaM (as shown in Figure 6A) and described below. Parameter values are listed in Table 1.

$$Reaction_{02} = k_{02}[Ca]^2[CaM] - k_{20}[Ca_2CaM] \quad (\text{Eq. 1})$$

$$Reaction_{24} = k_{24}[Ca]^2[Ca_2CaM] - k_{42}[Ca_4CaM] \quad (\text{Eq. 2})$$

$$Reaction_{02B} = k_{02B}[Ca]^2[CaMB] - k_{20B}[Ca_2CaMB] \quad (\text{Eq. 3})$$

$$Reaction_{24B} = k_{24B}[Ca]^2[Ca_2CaMB] - k_{42B}[Ca_4CaMB] \quad (\text{Eq. 4})$$

$$Reaction_{0B} = k_{0Bon}[CaM][B] - k_{0Boff}[CaMB] \quad (\text{Eq. 5})$$

$$Reaction_{2B} = k_{2Bon}[Ca_2CaM][B] - k_{2Eoff}[Ca_2CaMB] \quad (\text{Eq. 6})$$

$$Reaction_{4B} = k_{4Bon}[Ca_4CaM][B] - k_{4Boff}[Ca_4CaMB] \quad (\text{Eq. 7})$$

Differential equations (units in [ $\mu\text{M msec}^{-1}$ ]) for concentrations of free CaM,  $Ca_2CaM$ , and  $Ca_4CaM$ , computed separately for each compartment (dyadic cleft and cytosol).

$$[CaM] = [CaM_{TOT}] - [Ca_2CaM] - [Ca_4CaM] - [CaMB] - [Ca_2CaMB] - [Ca_4CaMB] - [CaMBsCaM] - [Ca_2CaMBsCaM] - [Ca_4CaMBsCaM] \quad (\text{Eq. 8})$$

$$[B] = [B_{TOT}] - [CaMB] - [Ca_2CaMB] - [Ca_4CaMB] \quad (\text{Eq. 9})$$

$$\frac{d[Ca_2CaM]}{dt} = 10^{-3} \{ Reaction_{02} - Reaction_{24} - Reaction_{2B} - Reaction_{2BsCaM} \} \quad (\text{Eq. 10})$$

$$\frac{d[Ca_4CaM]}{dt} = 10^{-3} \{ Reaction_{24} - Reaction_{4BsCaM} - Reaction_{4B} \} \quad (\text{Eq. 11})$$

$$\frac{d[CaMB]}{dt} = 10^{-3} (Reaction_{0B} - Reaction_{02B}) \quad (\text{Eq. 12})$$

$$\frac{d[Ca_2CaMB]}{dt} = 10^{-3} (Reaction_{02B} + Reaction_{2B} - Reaction_{24B}) \quad (\text{Eq. 13})$$

$$\frac{d[Ca_4CaMB]}{dt} = 10^{-3} (Reaction_{24B} + Reaction_{4B}) \quad (\text{Eq. 14})$$

### ***BsCaM-2 and BsCaM-45 activation***

Model of CaM binding to BsCaM-2 or BsCaM-45. Parameters listed in Table 2. Differential equation in units of [ $\mu\text{M msec}^{-1}$ ].

$$[BsCaM] = [BsCaM_{TOT}] - [CaMBsCaM] - [Ca_2CaMBsCaM] - [Ca_4CaMBsCaM] \quad (\text{Eq. 15})$$

$$Reaction_{02BsCaM} = k_{02BsCaM} [Ca]^2 [CaMBsCaM] - k_{20BsCaM} [Ca_2CaMBsCaM] \quad (\text{Eq. 16})$$

$$Reaction_{24BsCaM} = k_{24BsCaM} [Ca]^2 [Ca_2CaMBsCaM] - k_{42BsCaM} [Ca_4CaMBsCaM] \quad (\text{Eq. 17})$$

$$Reaction_{0BsCaM} = k_{BsCaM0on} [CaM][BsCaM] - k_{BsCaM0off} [CaMBsCaM] \quad (\text{Eq. 18})$$

$$Reaction_{2BsCaM} = k_{BsCaM2on} [Ca_2CaM][BsCaM] - k_{BsCaM2off} [Ca_2CaMBsCaM] \quad (\text{Eq. 19})$$

$$Reaction_{4BsCaM} = k_{BsCaM4on} [Ca_4CaM][BsCaM] - k_{BsCaM4off} [Ca_4CaMBsCaM] \quad (\text{Eq. 20})$$

$$\frac{d[CaMBsCaM]}{dt} = 10^{-3} (Reaction_{0BsCaM} - Reaction_{02BsCaM}) \quad (\text{Eq. 21})$$

$$\frac{d[Ca_2CaMBsCaM]}{dt} = 10^{-3} (Reaction_{2BsCaM} + Reaction_{02BsCaM} - Reaction_{24BsCaM}) \quad (\text{Eq. 22})$$

$$\frac{d[Ca_4CaMBsCaM]}{dt} = 10^{-3} (Reaction_{4BsCaM} + Reaction_{24BsCaM}) \quad (\text{Eq. 23})$$

**Table 1.** Ca/CaM binding and CaM buffering parameters.

| <b>Parameter</b>         | <b>Value</b>              | <b>Units</b>                       | <b>Description</b>                       | <b>References</b> |
|--------------------------|---------------------------|------------------------------------|------------------------------------------|-------------------|
| <b>k<sub>20</sub></b>    | 10                        | sec <sup>-1</sup>                  | 2 Ca dissociation f. CaM                 | (3)               |
| <b>k<sub>02</sub></b>    | k <sub>20</sub> /9.67     | μM <sup>-2</sup> sec <sup>-1</sup> | 2 Ca association w. CaM                  | (4, 5)            |
| <b>k<sub>42</sub></b>    | 500                       | sec <sup>-1</sup>                  | 2 Ca dissociation f. CaM                 | (3)               |
| <b>k<sub>24</sub></b>    | k <sub>42</sub> /575      | μM <sup>-2</sup> sec <sup>-1</sup> | 2 Ca association w. CaM                  | (4, 5)            |
| <b>k<sub>0Boff</sub></b> | 0.0014                    | sec <sup>-1</sup>                  | CaM dissociation f. Buff                 | (6)               |
| <b>k<sub>0Bon</sub></b>  | k <sub>0Boff</sub> /0.202 | μM <sup>-1</sup> sec <sup>-1</sup> | CaM association w. Buff                  | (6)               |
| <b>k<sub>2Boff</sub></b> | k <sub>0Boff</sub> /100   | sec <sup>-1</sup>                  | Ca <sub>2</sub> CaM dissociation f. Buff | (6)               |
| <b>k<sub>2Bon</sub></b>  | k <sub>0Bon</sub>         | μM <sup>-1</sup> sec <sup>-1</sup> | Ca <sub>2</sub> CaM association w. Buff  | -                 |
| <b>k<sub>4Boff</sub></b> | k <sub>0Boff</sub> /100   | sec <sup>-1</sup>                  | Ca <sub>4</sub> CaM dissociation f. Buff | (6)               |
| <b>k<sub>4Bon</sub></b>  | k <sub>0Bon</sub>         | μM <sup>-1</sup> sec <sup>-1</sup> | Ca <sub>4</sub> CaM association w. Buff  | -                 |
| <b>k<sub>42B</sub></b>   | k <sub>42</sub>           | sec <sup>-1</sup>                  | 2 Ca dissociation f. CaM <sub>Buff</sub> | detailed balance  |
| <b>k<sub>24B</sub></b>   | k <sub>24</sub>           | μM <sup>-2</sup> sec <sup>-1</sup> | 2 Ca association w. CaM <sub>Buff</sub>  | -                 |
| <b>k<sub>20B</sub></b>   | k <sub>20</sub> /100      | sec <sup>-1</sup>                  | 2 Ca dissociation f. CaM <sub>Buff</sub> | detailed balance  |
| <b>k<sub>02B</sub></b>   | k <sub>02</sub>           | μM <sup>-2</sup> sec <sup>-1</sup> | 2 Ca association w. CaM <sub>Buff</sub>  | -                 |

**Table 2.** BsCaM-2 and BsCaM-45 reaction parameters.

| <b>Parameter</b>   | <b>Value</b>                     | <b>Units</b>          | <b>Description</b>                             | <b>References</b> |
|--------------------|----------------------------------|-----------------------|------------------------------------------------|-------------------|
| $k_{BsCaM2-4off}$  | 0.05                             | $sec^{-1}$            | Ca <sub>4</sub> CaM dissociation f.<br>BsCaM2  | (7)               |
| $k_{BsCaM45-4off}$ | $0.05 * 45 / 1.5$                | $sec^{-1}$            | Ca <sub>4</sub> CaM dissociation f.<br>BsCaM45 | (7, 8)            |
| $k_{BsCaM4on}$     | $k_{BsCaM4off} / 1.5e-3$         | $\mu M^{-1} sec^{-1}$ | Ca <sub>4</sub> CaM association w. BsCaM       | (7)               |
| $k_{BsCaM2off}$    | $1.62e4 * k_{BsCaM4off}$         | $sec^{-1}$            | Ca <sub>2</sub> CaM dissociation f. BsCaM      | MLCK: (9, 10)     |
| $k_{BsCaM2on}$     | $k_{BsCaM4on}$                   | $\mu M^{-1} sec^{-1}$ | Ca <sub>2</sub> CaM association w. BsCaM       | -                 |
| $k_{BsCaM0off}$    | $1.62e4 * k_{BsCaM2off}$         | $sec^{-1}$            | CaM dissociation f. BsCaM                      | MLCK: (9, 10)     |
| $k_{BsCaM0on}$     | $k_{BsCaM2on}$                   | $\mu M^{-1} sec^{-1}$ | CaM association w. BsCaM                       | -                 |
| $k_{20BsCaM}$      | 1.6                              | $sec^{-1}$            | 2 Ca dissociation f. BsCaM                     | MLCK: (11-13)     |
| $k_{02BsCaM}$      | $k_{20BsCaM} * 1.62e4 / 57$<br>5 | $\mu M^{-2} sec^{-1}$ | 2 Ca association w. BsCaM                      | detailed balance  |
| $k_{42BsCaM}$      | 1.6                              | $sec^{-1}$            | 2 Ca dissociation f. BsCaM                     | MLCK: (12, 13)    |
| $k_{24BsCaM}$      | $k_{42BsCaM} * 1.62e4 / 9$<br>75 | $\mu M^{-2} sec^{-1}$ | 2 Ca association w. BsCaM                      | detailed balance  |

**Table 3.** Dyadic cleft and cytosolic total concentrations.

| <b>Parameter</b>                | <b>Value</b> | <b>Units</b> | <b>References</b> |
|---------------------------------|--------------|--------------|-------------------|
| <b>CaM<sub>TOT-CYT</sub></b>    | 5.65         | μM           | (14, 15)          |
| <b>CaM<sub>TOT-DYAD</sub></b>   | 418          | μM           | (16, 17)          |
| <b>B<sub>TOT-CYT</sub></b>      | 24.2         | μM           | (6)               |
| <b>B<sub>TOT-DYAD</sub></b>     | 0            | μM           | -                 |
| <b>BsCaM<sub>TOT-CYT</sub></b>  | 3e-3         | μM           | -                 |
| <b>BsCaM<sub>TOT-DYAD</sub></b> | 3.62         | μM           | (3e-3*Vmyo/Vdyad) |

## References

1. Shannon, T. R., F. Wang, J. Puglisi, C. Weber, and D. M. Bers. 2004. A mathematical treatment of integrated Ca dynamics within the ventricular myocyte. **Biophys J** 87:3351-3371.
2. Saucerman, J. J., and D. M. Bers. 2008. Calmodulin mediates differential sensitivity of CaMKII and calcineurin to local Ca<sup>2+</sup> in cardiac myocytes. **Biophys J**, Aug. 8 Epub ahead of print.
3. Klee, C. B. 1988. Interaction of calmodulin with Ca<sup>2+</sup> and target proteins. In Calmodulin. P. Cohen, and C. B. Klee, editors. Elsevier, Amsterdam ; New York. 35-56.
4. Linse, S., A. Helmersson, and S. Fors, n. 1991. Calcium binding to calmodulin and its globular domains. **J Biol Chem** 266:8050-8054.
5. Stemmer, P. M., and C. B. Klee. 1994. Dual calcium ion regulation of calcineurin by calmodulin and calcineurin B. **Biochemistry** 33:6859-6866.
6. Wu, X., and D. M. Bers. 2007. Free and bound intracellular calmodulin measurements in cardiac myocytes. **Cell Calcium** 41:353-364.
7. Tran, Q. K., D. J. Black, and A. Persechini. 2005. Dominant effectors in the calmodulin network shape the time courses of target responses in the cell. **Cell Calcium** 37:541-553.
8. Romoser, V. A., P. M. Hinkle, and A. Persechini. 1997. Detection in living cells of Ca<sup>2+</sup>-dependent changes in the fluorescence emission of an indicator composed of two green fluorescent protein variants linked by a calmodulin-binding sequence. A new class of fluorescent indicators. **J Biol Chem** 272:13270-13274.
9. Persechini, A., and P. M. Stemmer. 2002. Calmodulin is a limiting factor in the cell. **Trends Cardiovasc Med** 12:32-37.
10. Cox, J. A. 1988. Interactive properties of calmodulin. **Biochem J** 249:621-629.
11. Persechini, A., H. D. White, and K. J. Gansz. 1996. Different mechanisms for Ca<sup>2+</sup> dissociation from complexes of calmodulin with nitric oxide synthase or myosin light chain kinase. **J Biol Chem** 271:62-67.
12. Kasturi, R., C. Vasulka, and J. D. Johnson. 1993. Ca<sup>2+</sup>, caldesmon, and myosin light chain kinase exchange with calmodulin. **J Biol Chem** 268:7958-7964.
13. Johnson, J. D., C. Snyder, M. Walsh, and M. Flynn. 1996. Effects of myosin light chain kinase and peptides on Ca<sup>2+</sup> exchange with the N- and C-terminal Ca<sup>2+</sup> binding sites of calmodulin. **J Biol Chem** 271:761-767.
14. Fabiato, A. 1983. Calcium-induced release of calcium from the cardiac sarcoplasmic reticulum. **Am J Physiol** 245:C1-14.
15. Maier, L. S., M. T. Ziolo, J. Bossuyt, A. Persechini, R. Mestrl, and D. M. Bers. 2006. Dynamic changes in free Ca-calmodulin levels in adult cardiac myocytes. **J Mol Cell Cardiol** 41:451-458.
16. Balshaw, D. M., L. Xu, N. Yamaguchi, D. A. Pasek, and G. Meissner. 2001. Calmodulin binding and inhibition of cardiac muscle calcium release channel (ryanodine receptor). **J Biol Chem** 276:20144-20153.
17. Mori, M. X., M. G. Erickson, and D. T. Yue. 2004. Functional stoichiometry and local enrichment of calmodulin interacting with Ca<sup>2+</sup> channels. **Science** 304:432-435.
